# Supplementary material for: Clinical characteristics associated with ARDS and mortality in patients with COVID-19 who received corticosteroid therapy
Source: Research Square preprint supplement (doi:10.21203/rs.3.rs-6384044/v1), 2025-05-19
Supplement: Supplementary file 1 [file f2295b6c7499b2f186b2f269.docx]

**Clinical characteristics associated with ARDS and mortality in patients with COVID-19 who received corticosteroid therapy**

**Supplementary Material**

# **Appendix A: Table Legends & Tables**

## **Table Legends**

**Table A.1. Patient data stratified by ARDS development and by mortality**

Demographics, baseline characteristics and clinical characteristics of patients infected with severe COVID-19 who received corticosteroids during hospitalization. Data stratified by ARDS and by mortality are shown. This table displays the full list of variables considered in this study. Abbreviations used: ACE = Angiotensin-converting enzyme, AF = Atrial fibrillation, AKI = acute kidney injury, ALT = Alanine transaminase, BP = Blood pressure, CKD = Chronic kidney disease, COP = Cryptogenic organizing pneumonia, COPD = Chronic obstructive pulmonary disease, CAD = Coronary artery disease, DVT = Deep vein thrombosis, DIC = Disseminated intravascular coagulation, GI = Gastrointestinal, HIV = Human immunodeficiency virus, ICU = Intensive care unit, IMV = Invasive mechanical ventilation, IVIG = Intravenous immunoglobulin, LVF = Left ventricular failure, MI = Myocardial infarction, NSTEMI = Non-ST segment elevation myocardial infarction, PE = Pulmonary embolism, PH = Pulmonary hypertension, SD = Standard deviation, STEMI = ST segment elevation myocardial infarction, TIA = Transient ischemic attack, VT = ventricular tachycardia, WBC = White blood cell.

**Table A.2. Patient data stratified by ARDS development then by progression to death**Demographics, baseline characteristics and clinical characteristics of patients infected with severe COVID-19 who received corticosteroids during hospitalization. Data are stratified by those who developed ARDS and those who did not then further stratified by patients who survived and those who did not. This table displays the full list of variables considered in this study. Abbreviations used: ACE = Angiotensin-converting enzyme, AF = Atrial fibrillation, AKI = acute kidney injury, ALT = Alanine transaminase, BP = Blood pressure, CKD = Chronic kidney disease, COP = Cryptogenic organizing pneumonia, COPD = Chronic obstructive pulmonary disease, CAD = Coronary artery disease, DVT = Deep vein thrombosis, DIC = Disseminated intravascular coagulation, GI = Gastrointestinal, HIV = Human immunodeficiency virus, ICU = Intensive care unit, IMV = Invasive mechanical ventilation, IVIG = Intravenous immunoglobulin, LVF = Left ventricular failure, MI = Myocardial infarction, NSTEMI = Non-ST segment elevation myocardial infarction, PE = Pulmonary embolism, PH = Pulmonary hypertension, SD = Standard deviation, STEMI = ST segment elevation myocardial infarction, TIA = Transient ischemic attack, VT = ventricular tachycardia, WBC = White blood cell.

**Table A.3. Risk factors for ARDS development**

Results of the logistic regression model to predict ARDS development are shown. The model is based on information that would be available to a healthcare provider upon hospital admission. Odds ratios are calculated from model coefficients. The Wald test is used to compute associated P-values and values below 0.05 were considered significant (Significance: P-value < 0.05 = *, P-value < 0.01 = **, P-value < 0.001 = ***). Abbreviations used: CKD = Chronic kidney disease, COPD = Chronic obstructive pulmonary disease, CAD = Coronary artery disease, MI = Myocardial infarction, WBC = White Blood Cell.

**Table A.4. Risk factors for mortality**

Results of the logistic regression model to predict mortality are shown. The model is based on information that would be available to a healthcare provider upon hospital admission as well as the binary variable of ARDS development. Odds ratios are calculated from model coefficients. The Wald test is used to compute associated P-values and values below 0.05 were considered significant (Significance: P-value < 0.05 = *, P-value < 0.01 = **, P-value < 0.001 = ***). Abbreviations used: CKD = Chronic kidney disease, COPD = Chronic obstructive pulmonary disease, CAD = Coronary artery disease, MI = Myocardial infarction, WBC = White Blood Cell.

## **Tables**

**Table A.1. Patient data stratified by ARDS development and by mortality**

|  | **All** | **ARDS** | | | **Death** | | |
| --- | --- | --- | --- | --- | --- | --- | --- |
|  |  | **Yes** | **No** | *Adj.* | **Yes** | **No** | *Adj.* |
|  | **n = 317** | **n = 138** | **n = 179** | *P-*  *value*[[1]](#footnote-1) | **n = 90** | **n = 227** | *P-valuea* |
| **Patient characteristics (n (%))** | | |  |  |  |  |  |
| Age, mean years (SD) | 63.6 (16.0) | 63.4 (15.4) | 63.8 (16.4) | 1.0000 | 73.2 (12.7) | 59.8 (15.5) | 0.0005 |
| Sex, number of males | 222 (70.0) | 99 (71.7) | 123 (68.7) | 0.7687 | 63 (70.0) | 159 (70.0) | 0.9938 |
| Patients who do not smoke | 141 (63.5) | 61 (60.4) | 80 (66.1) | 0.7687 | 32 (59.3) | 113 (65.3) | 0.4599 |
| Patients who smoke | 11 (5.0) | 5 (5.0) | 6 (5.0) | 0.7687 | 2 (3.7) | 9 (5.2) | 0.4599 |
| Patient who previously smoked | 66 (29.7) | 34 (33.7) | 32 (26.4) | 0.7687 | 20 (37.0) | 47 (27.2) | 0.4599 |
| Drugs | 7 (2.6) | 3 (2.6) | 4 (2.6) | 1.0000 | 0 (0) | 7 (3.6) | 0.3517 |
| Healthcare worker | 11 (3.6) | 3 (2.2) | 8 (4.7) | 0.7687 | 0 (0) | 12 (5.3) | 0.0033 |
| **Outcomes (n (%))** | |  |  |  |  |  |  |
| Death / ARDS |  | 56 (40.6) | 34 (19.0) | <0.0001 | 56 (62.2) | 82 (36.1) | 0.0012 |
| ***At hospital admission*** | |  |  |  |  |  |  |
| **Concomitant medications (n (%))** | |  |  |  |  |  |  |
| ACE inhibitors | 90 (28.8) | 43 (31.4) | 47 (26.9) | 0.7616 | 33 (36.7) | 57 (25.0) | 0.0750 |
| Anticoagulants | 49 (15.8) | 17 (12.5) | 32 (18.4) | 0.4749 | 20 (22.5) | 29 (12.8) | 0.0750 |
| Colchicine | 4 (1.3) | 2 (1.5) | 2 (1.1) | 0.7805 | 1 (1.1) | 3 (1.3) | 1.0000 |
| Insulin | 75 (27.2) | 39 (32.0) | 36 (23.4) | 0.4749 | 29 (37.2) | 47 (23.0) | 0.0750 |
| Immunosuppressants | 29 (9.4) | 11 (8.0) | 18 (10.5) | 0.7805 | 12 (13.3) | 20 (9.0) | 0.3752 |
| **Comorbidities (n (%))** | |  |  |  |  |  |  |
| Total number (mean (SD)) | 4.1 (3.0) | 4.1 (3.0) | 4.0 (3.0) | 0.9812 | 5.4 (3.3) | 3.5 (2.7) | 0.0018 |
| Asthma | 40 (12.9) | 20 (14.7) | 20 (11.6) | 0.9812 | 9 (10.2) | 32 (14.1) | 0.4210 |
| AF | 30 (9.7) | 12 (8.9) | 18 (10.3) | 0.9812 | 13 (14.4) | 17 (7.6) | 0.0898 |
| Cancer | 42 (13.5) | 15 (10.9) | 27 (15.4) | 0.8590 | 21 (23.3) | 21 (9.2) | 0.0063 |
| Cardiac disease | 41 (13.2) | 16 (11.8) | 25 (14.4) | 0.9812 | 11 (12.5) | 30 (13.2) | 0.8760 |
| CKD | 46 (14.8) | 21 (15.4) | 25 (14.4) | 0.9812 | 25 (27.8) | 23 (10.2) | 0.0018 |
| COPD | 35 (11.3) | 14 (10.4) | 21 (12.0) | 0.9812 | 18 (20.0) | 17 (7.6) | 0.0063 |
| CAD | 48 (15.4) | 22 (16.1) | 26 (14.9) | 0.9812 | 23 (25.6) | 25 (11.0) | 0.0063 |
| Dementia | 17 (5.5) | 4 (2.9) | 13 (7.5) | 0.7434 | 11 (12.2) | 6 (2.6) | 0.0063 |
| Diabetes | 113 (36.5) | 51 (37.5) | 62 (35.6) | 0.9812 | 40 (44.4) | 74 (32.7) | 0.0883 |
| Dialysis | 10 (3.3) | 4 (3.0) | 6 (3.6) | 1.0000 | 5 (5.8) | 5 (2.3) | 0.1952 |
| Heart failure | 24 (7.7) | 7 (5.1) | 17 (9.7) | 0.7838 | 11 (12.2) | 13 (5.7) | 0.0883 |
| Hematological disease | 23 (7.4) | 10 (7.3) | 13 (7.4) | 1.0000 | 12 (13.3) | 11 (4.8) | 0.0240 |
| HIV | 1 (0.3) | 1 (0.7) | 0 (0) | 0.9812 | 1 (1.1) | 0 (0) | 0.3503 |
| Hypertension | 167 (53.7) | 79 (58.1) | 88 (50.3) | 0.7838 | 60 (67.4) | 108 (47.4) | 0.0063 |
| Immunosuppressed state | 31 (9.9) | 12 (8.8) | 19 (10.9) | 0.9812 | 14 (15.6) | 18 (7.9) | 0.0883 |
| Liver disease | 20 (6.4) | 8 (5.8) | 12 (6.9) | 0.9812 | 6 (6.7) | 14 (6.1) | 0.8750 |
| Lung disease | 30 (9.7) | 13 (9.6) | 17 (9.8) | 1.0000 | 13 (14.9) | 18 (7.9) | 0.0898 |
| Malnutrition | 7 (2.3) | 5 (3.8) | 2 (1.2) | 0.8590 | 4 (4.7) | 3 (1.3) | 0.1304 |
| MI | 19 (6.1) | 12 (8.8) | 7 (4.0) | 0.7434 | 10 (11.1) | 9 (3.9) | 0.0398 |
| Neurological disease | 29 (9.4) | 10 (7.4) | 19 (11.0) | 0.8751 | 9 (10.2) | 20 (8.8) | 0.7602 |
| Obesity | 60 (19.9) | 31 (23.5) | 29 (17.1) | 0.7838 | 8 (9.5) | 52 (23.2) | 0.0223 |
| Psychiatric disease | 28 (9.0) | 13 (9.5) | 15 (8.7) | 0.9812 | 9 (10.0) | 19 (8.4) | 0.7328 |
| PH | 2 (0.6) | 1 (0.7) | 1 (0.6) | 1.0000 | 2 (2.2) | 0 (0) | 0.1128 |
| Rheumatologic disease | 35 (11.3) | 13 (9.5) | 22 (12.7) | 0.9812 | 15 (16.7) | 20 (8.8) | 0.0883 |
| Stroke | 16 (5.2) | 8 (5.9) | 8 (4.6) | 0.9812 | 10 (11.4) | 6 (2.6) | 0.0117 |
| TIA | 6 (1.9) | 3 (2.2) | 3 (1.7) | 1.0000 | 4 (4.5) | 2 (0.9) | 0.0883 |
| **COVID-19 Symptoms (n (%))** | | |  |  |  |  |  |
| Total number (mean (SD)) | 5.1 (2.8) | 5.1 (2.9) | 5.2 (2.8) | 0.9556 | 4.4 (2.2) | 5.4 (3.0) | 0.1086 |
| Abdominal Pain | 31 (10.0) | 10 (7.3) | 21 (12.1) | 0.5809 | 6 (6.7) | 26 (11.4) | 0.5563 |
| Anosmia | 35 (11.3) | 15 (10.9) | 20 (11.5) | 0.9972 | 4 (4.5) | 32 (14.0) | 0.0789 |
| Arthralgia | 12 (3.9) | 9 (6.6) | 3 (1.7) | 0.5809 | 4 (4.5) | 9 (3.9) | 0.8877 |
| Appetite | 82 (26.4) | 34 (24.8) | 48 (27.6) | 0.8811 | 22 (24.7) | 61 (26.8) | 0.8877 |
| Chest pain | 86 (27.7) | 43 (31.4) | 43 (24.7) | 0.5809 | 24 (27.0) | 65 (28.5) | 0.8877 |
| Confusion | 37 (11.9) | 20 (14.6) | 17 (9.8) | 0.5809 | 16 (18.0) | 22 (9.6) | 0.1313 |
| Cough | 217 (69.8) | 90 (65.7) | 127 (73.0) | 0.5809 | 52 (58.4) | 168 (73.7) | 0.0600 |
| Diarrhea | 78 (25.1) | 30 (21.9) | 48 (27.6) | 0.5809 | 13 (14.6) | 65 (28.5) | 0.0600 |
| Dizziness | 37 (11.9) | 14 (10.2) | 23 (13.2) | 0.7601 | 7 (7.9) | 31 (13.6) | 0.4554 |
| Dysphagia | 8 (2.6) | 6 (4.4) | 2 (1.1) | 0.5809 | 2 (2.2) | 6 (2.6) | 1.0000 |
| Dyspnea | 281 (90.4) | 121 (88.3) | 160 (92.0) | 0.5978 | 75 (84.3) | 211 (92.5) | 0.1054 |
| Edema | 9 (2.9) | 6 (4.4) | 3 (1.7) | 0.5809 | 4 (4.5) | 5 (2.2) | 0.5981 |
| Extremity weakness | 45 (14.5) | 16 (11.7) | 29 (16.7) | 0.5809 | 10 (11.2) | 35 (15.4) | 0.5981 |
| Fatigue | 181 (58.2) | 76 (55.5) | 105 (60.3) | 0.7597 | 48 (53.9) | 136 (59.6) | 0.5981 |
| Fever | 207 (66.6) | 92 (67.2) | 115 (66.1) | 0.9972 | 56 (62.9) | 154 (67.5) | 0.6862 |
| Headache | 47 (15.1) | 15 (10.9) | 32 (18.4) | 0.5809 | 4 (4.5) | 43 (18.9) | 0.0294 |
| Myalgia | 67 (21.5) | 32 (23.4) | 35 (20.1) | 0.8328 | 10 (11.2) | 58 (25.4) | 0.0600 |
| Nausea | 42 (13.5) | 22 (16.1) | 20 (11.5) | 0.5809 | 13 (14.6) | 31 (13.6) | 0.8877 |
| Rhinorrhea | 12 (3.9) | 6 (4.4) | 6 (3.4) | 0.9521 | 2 (2.2) | 10 (4.4) | 0.7730 |
| Seizure | 4 (1.3) | 2 (1.5) | 2 (1.1) | 1.0000 | 2 (2.2) | 2 (0.9) | 0.5981 |
| Skin rash | 2 (0.6) | 1 (0.7) | 1 (0.6) | 1.0000 | 0 (0) | 2 (0.9) | 1.0000 |
| Sore throat | 33 (10.6) | 16 (11.7) | 17 (9.8) | 0.8811 | 7 (7.9) | 26 (11.4) | 0.5981 |
| Sputum | 26 (8.4) | 11 (8.0) | 15 (8.6) | 0.9972 | 8 (9.0) | 18 (7.9) | 0.8877 |
| Wheezing | 9 (2.9) | 3 (2.2) | 6 (3.4) | 0.9625 | 2 (2.2) | 8 (3.5) | 0.8877 |
| **Vital signs** |  |  |  |  |  |  |  |
| Diastolic BP [mmHg] | 74.3 (12.3) | 74.0 (12.6) | 74.4 (12.1) | 0.9606 | 72.3 (13.4) | 75.0 (11.8) | 0.1030 |
| Systolic BP [mmHg] | 128.8 (23.3) | 128.7 (24.6) | 129.0 (22.3) | 0.9072 | 129.2 (26.3) | 128.7 (22.1) | 0.7397 |
| Respiratory rate [/min] | 26.1 (7.5) | 26.8 (7.6) | 25.7 (7.4) | 0.2728 | 24.8 (6.5) | 26.7 (7.8) | 0.1030 |
| Temperature [C] | 37.3 (1.0) | 37.3 (0.9) | 37.3 (1.0) | 0.9072 | 37.3 (0.9) | 37.3 (1.0) | 0.7249 |
| **Lab results** |  |  |  |  |  |  |  |
| WBC count [x109/L] | 9.2 (5.5) | 10.0 (5.9) | 8.5 (5.0) | 0.0731 | 9.8 (6.6) | 8.9 (4.9) | 0.6802 |
| Basophile count [x109/L] | 0.01 (0.02) | 0.007 (0.02) | 0.02 (0.03) | 0.0096 | 0.01 (0.03) | 0.01 (0.02) | 0.9407 |
| Eosinophile count [x109/L] | 0.02 (0.1) | 0.03 (0.2) | 0.02 (0.1) | 0.5381 | 0.02 (0.1) | 0.03 (0.1) | 0.6802 |
| Lymphocyte count [x109/L] | 0.9 (0.9) | 0.9 (1.3) | 0.8 (0.5) | 0.6757 | 1.0 (1.6) | 0.8 (0.5) | 0.6802 |
| Monocyte count [x109/L] | 0.6 (0.6) | 0.6 (0.8) | 0.6 (0.5) | 0.5356 | 0.7 (1.0) | 0.5 (0.4) | 0.4291 |
| Neutrophil count [x109/L] | 7.6 (4.5) | 8.3 (4.7) | 7.0 (4.4) | 0.0455 | 7.9 (4.8) | 7.5 (4.4) | 0.6802 |
| Haemoglobin [g/L] | 131.1 (20.2) | 129.7 (18.8) | 132.2 (21.3) | 0.2158 | 127.6 (19.5) | 132.5 (20.4) | 0.2277 |
| Platelet count [x109/L] | 220.8 (97.9) | 223.9 (97.9) | 218.4 (98.2) | 0.5455 | 205.5 (89.6) | 227.1 (100.7) | 0.4291 |
| ALT [U/L] | 74.0 (289.1) | 112.3 (431.5) | 43.6 (31.8) | 0.0831 | 47.6 (46.6) | 82.5 (331.5) | 0.6802 |
| Creatinine [umol/L] | 125.1 (153.2) | 132.8 (154.3) | 118.8 (152.6) | 0.6738 | 142.3 (107.6) | 118.1 (167.8) | 0.0198 |
| Glucose [mmol/L] | 9.2 (4.5) | 10.2 (4.9) | 8.4 (4.1) | 0.0018 | 9.7 (4.8) | 8.9 (4.4) | 0.4291 |
| Potassium [mmol/L] | 4.2 (0.6) | 4.2 (0.6) | 4.1 (0.6) | 0.7965 | 4.2 (0.7) | 4.1 (0.6) | 0.6802 |
| Sodium [mmol/L] | 137.2 (5.1) | 137.6 (5.4) | 136.9 (4.8) | 0.2158 | 137.6 (5.7) | 137.1 (4.8) | 0.6802 |
| ***During hospitalization*** | |  |  |  |  |  |  |
| **Hospitalization details** | |  |  |  |  |  |  |
| Number of days hospitalized (mean (SD)) | 26.1 (29.6) | 34.8 (35.3) | 19.4 (22.1) | 0.0001 | 27.2 (26.8) | 25.7 (30.6) | 0.1004 |
| ICU stay (n (%)) | 238 (75.1) | 128 (92.8) | 110 (61.5) | 0.0001 | 70 (77.8) | 168 (74.0) | 0.6225 |
| Number of days in ICU (mean (SD)) | 19.2 (25.6) | 25.2 (30.2) | 12.3 (16.8) | 0.0001 | 27.5 (28.8) | 15.7 (23.4) | 0.0005 |
| **Complications - Other than ARDS (n (%))** | | |  |  |  |  |  |
| AKI | 104 (33.0) | 68 (49.6) | 36 (20.2) | 0.0004 | 50 (55.6) | 54 (24.0) | 0.0012 |
| Anemia | 77 (24.4) | 42 (30.7) | 35 (19.6) | 0.0583 | 30 (33.7) | 47 (20.7) | 0.0497 |
| Arrythmia | 23 (7.3) | 15 (11.0) | 8 (4.5) | 0.0630 | 11 (12.5) | 12 (5.3) | 0.0805 |
| AF | 28 (8.9) | 20 (14.6) | 8 (4.5) | 0.0058 | 9 (10.1) | 19 (8.4) | 0.8468 |
| Bacteremia | 41 (13.0) | 32 (23.5) | 9 (5.0) | 0.0004 | 17 (19.3) | 24 (10.6) | 0.0976 |
| Cardiac arrest | 9 (2.8) | 9 (6.6) | 0 (0) | 0.0020 | 8 (9.0) | 1 (0.4) | 0.0014 |
| COP | 8 (2.5) | 5 (3.6) | 3 (1.7) | 0.4532 | 2 (2.2) | 6 (2.6) | 1.0000 |
| DVT | 7 (2.2) | 4 (2.9) | 3 (1.7) | 0.6088 | 3 (3.4) | 4 (1.8) | 0.7565 |
| DIC | 3 (1.0) | 2 (1.5) | 1 (0.6) | 0.6346 | 1 (1.1) | 2 (0.9) | 1.0000 |
| Endocarditis | 1 (0.3) | 1 (0.7) | 0 (0) | 0.5807 | 0 (0) | 1 (0.4) | 1.0000 |
| GI bleed | 5 (1.6) | 1 (0.7) | 4 (2.2) | 0.5461 | 2 (2.2) | 3 (1.3) | 0.8468 |
| Heart failure | 10 (3.2) | 8 (5.9) | 2 (1.1) | 0.0583 | 6 (6.8) | 4 (1.8) | 0.0888 |
| Hyperglycemia | 90 (28.8) | 59 (43.4) | 31 (17.5) | 0.0004 | 28 (31.5) | 62 (27.7) | 0.7966 |
| Hypernatremia | 9 (2.8) | 5 (3.6) | 4 (2.2) | 0.6093 | 1 (1.1) | 8 (3.5) | 0.7966 |
| Hypoglycemia | 10 (3.2) | 3 (2.2) | 7 (3.9) | 0.6093 | 2 (2.2) | 8 (3.5) | 0.9103 |
| Hyponatremia | 17 (5.4) | 14 (10.2) | 3 (1.7) | 0.0032 | 6 (6.7) | 11 (4.8) | 0.8403 |
| LVF | 16 (5.8) | 10 (8.5) | 6 (3.8) | 0.1025 | 6 (8.2) | 10 (5.0) | 0.7966 |
| Liver | 45 (14.2) | 26 (19.0) | 19 (10.6) | 0.0777 | 10 (11.2) | 35 (15.4) | 0.6678 |
| NSTEMI | 25 (7.9) | 15 (10.9) | 10 (5.6) | 0.1323 | 8 (9.0) | 17 (7.5) | 0.8479 |
| Pancreatitis | 3 (1.0) | 1 (0.7) | 2 (1.1) | 1.0000 | 0 (0) | 3 (1.3) | 0.8403 |
| Pericarditis | 2 (0.6) | 0 (0) | 2 (1.1) | 0.6093 | 0 (0) | 2 (0.9) | 1.0000 |
| Pleural effusion | 48 (15.2) | 25 (18.2) | 23 (12.8) | 0.2920 | 22 (24.7) | 26 (11.5) | 0.0138 |
| Pneumonia | 85 (27.2) | 58 (42.6) | 27 (15.3) | 0.0004 | 33 (37.5) | 52 (23.1) | 0.0359 |
| Pneumonitis | 135 (42.9) | 67 (48.9) | 68 (38.2) | 0.1025 | 42 (47.2) | 93 (41.2) | 0.6678 |
| Pneumothorax | 21 (6.7) | 15 (10.9) | 6 (3.4) | 0.0222 | 10 (11.2) | 11 (4.9) | 0.0977 |
| PE | 41 (13.0) | 30 (21.9) | 11 (6.1) | 0.0004 | 12 (13.5) | 29 (12.8) | 1.0000 |
| Rhabdomyolysis | 7 (2.2) | 6 (4.4) | 1 (0.6) | 0.0895 | 6 (6.8) | 1 (0.4) | 0.0127 |
| Seizure | 3 (0.9) | 2 (1.5) | 1 (0.6) | 0.6346 | 2 (2.2) | 1 (0.4) | 0.4269 |
| STEMI | 5 (1.6) | 1 (0.7) | 4 (2.2) | 0.5461 | 1 (1.1) | 4 (1.8) | 1.0000 |
| Stroke | 6 (1.9) | 3 (2.2) | 3 (1.7) | 1.0000 | 5 (5.7) | 1 (0.4) | 0.0288 |
| TIA | 1 (0.3) | 0 (0) | 1 (0.6) | 1.0000 | 0 (0) | 1 (0.4) | 1.0000 |
| VT | 9 (2.9) | 7 (5.1) | 2 (1.1) | 0.0895 | 7 (8.0) | 2 (0.9) | 0.0127 |
| **Drug treatments administered - Other than corticosteroids (n (%))** | | | | |  |  |  |
| Antifungal | 54 (17.0) | 38 (27.5) | 16 (8.9) | 0.0018 | 28 (31.1) | 26 (11.5) | 0.0009 |
| Azithromycin | 208 (65.6) | 103 (74.6) | 105 (58.7) | 0.0180 | 57 (63.3) | 151 (66.5) | 0.8033 |
| Chloroquine | 2 (0.6) | 1 (0.7) | 1 (0.6) | 1.0000 | 1 (1.1) | 1 (0.4) | 0.7984 |
| Colchicine | 7 (2.2) | 2 (1.4) | 5 (2.8) | 0.9737 | 1 (1.1) | 6 (2.6) | 0.8132 |
| Hydroxychloroquine | 1 (0.3) | 1 (0.7) | 0 (0) | 0.9737 | 1 (1.1) | 0 (0) | 0.5678 |
| Invermectin | 12 (3.8) | 6 (4.3) | 6 (3.4) | 0.9737 | 4 (4.4) | 8 (3.5) | 0.8399 |
| IVIG | 4 (1.3) | 1 (0.7) | 3 (1.7) | 0.9737 | 0 (0) | 4 (1.8) | 0.8033 |
| Kineret | 6 (1.9) | 1 (0.7) | 5 (2.8) | 0.7137 | 0 (0) | 6 (2.6) | 0.4253 |
| Other Antivirals[[2]](#footnote-2) | 14 (4.4) | 6 (4.3) | 8 (4.5) | 1.0000 | 11 (12.2) | 3 (1.3) | 0.0009 |
| Other Antibioticsb | 266 (83.9) | 127 (92.0) | 139 (77.7) | 0.0054 | 86 (95.6) | 180 (79.3) | 0.0024 |
| Other immunomodulatorsb | 18 (5.7) | 7 (5.1) | 11 (6.1) | 0.9737 | 9 (10.0) | 9 (4.0) | 0.1089 |
| Plasma | 7 (2.2) | 3 (2.2) | 4 (2.2) | 1.0000 | 3 (3.3) | 4 (1.8) | 0.7375 |
| Remdesivir | 54 (17.0) | 19 (13.8) | 35 (19.6) | 0.6275 | 9 (10.0) | 45 (19.8) | 0.1089 |
| Ribavirin | 1 (0.3) | 0 (0) | 1 (0.6) | 1.0000 | 0 (0) | 1 (0.4) | 1.0000 |
| Sarilumab | 5 (1.6) | 3 (2.2) | 2 (1.1) | 0.9737 | 2 (2.2) | 3 (1.3) | 0.8033 |
| Tocilizumab | 91 (28.7) | 43 (31.2) | 48 (26.8) | 0.9737 | 16 (17.8) | 75 (33.0) | 0.0306 |
| **Non-drug interventions administered** | | |  |  |  |  |  |
| O2 therapy (n %)) | 310 (100.0) | 137 (100.0) | 173 (100.0) | N/A | 88 (100.0) | 222 (100.0) | N/A |
| Number of days O2 therapy (mean (SD)) | 21.0 (27.7) | 30.9 (34.9) | 14.0 (18.4) | 0.0002 | 27.5 (29.3) | 18.5 (26.7) | 0.0002 |
| IMV (n (%)) | 124 (39.1) | 87 (63.0) | 37 (20.7) | 0.0002 | 59 (65.6) | 65 (28.6) | 0.0002 |

**Table A.2. Patient data stratified by ARDS development then by progression to death**

|  | **ARDS** | | | **No ARDS** | | |
| --- | --- | --- | --- | --- | --- | --- |
|  | **n = 138** | | | **n = 179** | | |
|  | **Survived** | **Died** | *Adj.* | **Survived** | **Died** | *Adj.* |
|  | **n = 82** | **n = 56** | *P-value*[[3]](#footnote-3) | **n = 145** | **n = 34** | *P-valuec* |
| **Patient Characteristics (n (%))** | |  |  |  |  |  |
| Age, mean years (SD) | 58.2 (14.9) | 71.1 (12.7) | 0.0008 | 60.7 (15.9) | 76.7 (12.0) | 0.0009 |
| Sex, number of males | 60 (73.2) | 39 (69.6) | 0.6513 | 99 (68.3) | 24 (70.6) | 0.9312 |
| Patients who do not smoke | 46 (66.7) | 16 (48.5) | 0.1545 | 66 (64.1) | 16 (76.2) | 0.9312 |
| Patients who smoke | 4 (5.8) | 1 (3.0) | 0.1545 | 5 (4.9) | 1 (4.8) | 0.9312 |
| Patients who previously smoked | 18 (26.1) | 16 (48.5) | 0.1545 | 29 (28.2) | 4 (19.0) | 0.9312 |
| Drugs | 3 (4.2) | 0 (0) | 0.3243 | 4 (3.2) | 0 (0) | 1.0000 |
| Healthcare worker | 3 (3.7) | 0 (0) | 0.1545 | 9 (6.3) | 0 (0) | 0.1040 |
| ***At hospital admission*** | |  |  |  |  |  |
| **Concomitant medications (n (%))** | |  |  |  |  |  |
| ACE inhibitors | 24 (29.3) | 19 (33.9) | 0.7020 | 33 (22.8) | 14 (41.2) | 0.1340 |
| Anticoagulants | 7 (8.5) | 10 (18.2) | 0.2330 | 22 (15.3) | 10 (29.4) | 0.1340 |
| Colchicine | 1 (1.2) | 1 (1.8) | 1.0000 | 2 (1.4) | 0 (0) | 1.0000 |
| Insulin | 17 (23.3) | 22 (44.0) | 0.0765 | 30 (23.1) | 7 (25.0) | 1.0000 |
| Immunosuppresants | 6 (7.3) | 6 (10.7) | 0.5942 | 13 (9.3) | 6 (17.6) | 0.6165 |
| **Comorbidities (n (%))** | |  |  |  |  |  |
| Total number (mean (SD)) | 3.4 (2.5) | 5.2 (3.3) | 0.0373 | 3.6 (2.8) | 5.7 (3.1) | 0.0027 |
| Asthma | 15 (18.3) | 5 (9.1) | 0.2698 | 17 (11.8) | 4 (12.1) | 1.0000 |
| AF | 3 (3.8) | 9 (16.1) | 0.0963 | 14 (9.7) | 4 (11.8) | 0.7818 |
| Cancer | 4 (4.9) | 11 (19.6) | 0.0434 | 17 (11.7) | 10 (29.4) | 0.0366 |
| Cardiac disease | 8 (9.8) | 8 (14.5) | 0.5279 | 22 (15.2) | 3 (9.1) | 0.7435 |
| CKD | 8 (9.9) | 14 (25.0) | 0.0963 | 14 (9.7) | 11 (32.4) | 0.0115 |
| COPD | 5 (6.3) | 9 (16.1) | 0.1910 | 12 (8.3) | 9 (26.5) | 0.0311 |
| CAD | 7 (8.5) | 15 (26.8) | 0.0373 | 18 (12.4) | 8 (23.5) | 0.2448 |
| Dementia | 2 (2.4) | 2 (3.6) | 1.0000 | 4 (2.8) | 9 (26.5) | 0.0027 |
| Diabetes | 24 (29.6) | 27 (48.2) | 0.0963 | 50 (34.7) | 13 (38.2) | 0.7818 |
| Dialysis | 1 (1.3) | 3 (5.6) | 0.4718 | 4 (2.9) | 2 (6.2) | 0.5008 |
| Heart failure | 3 (3.7) | 4 (7.1) | 0.5374 | 10 (6.9) | 7 (20.6) | 0.0763 |
| Hematological disease | 3 (3.7) | 7 (12.5) | 0.2288 | 8 (5.5) | 5 (14.7) | 0.2022 |
| HIV | 0 (0) | 1 (1.8) | 0.5279 | 0 (0) | 0 (0) | NA |
| Hypertension | 43 (52.4) | 36 (65.5) | 0.2698 | 65 (44.8) | 24 (70.6) | 0.0311 |
| Immunosuppressed state | 5 (6.1) | 7 (12.5) | 0.3960 | 13 (9.0) | 7 (20.6) | 0.2022 |
| Liver disease | 3 (3.7) | 5 (8.9) | 0.4439 | 11 (7.6) | 1 (3.0) | 0.7818 |
| Lung disease | 4 (4.9) | 9 (16.7) | 0.0963 | 14 (9.7) | 4 (12.1) | 0.7818 |
| Malnutrition | 2 (2.5) | 3 (5.6) | 0.5279 | 1 (0.7) | 1 (3.1) | 0.5024 |
| MI | 4 (4.9) | 8 (14.3) | 0.1910 | 5 (3.4) | 2 (5.9) | 0.7597 |
| Neurological disease | 6 (7.4) | 4 (7.3) | 1.0000 | 14 (9.7) | 5 (15.2) | 0.5083 |
| Obesity | 26 (32.1) | 5 (9.6) | 0.0373 | 26 (18.3) | 3 (9.4) | 0.3969 |
| Psychiatric disease | 8 (9.8) | 5 (8.9) | 0.9371 | 11 (7.7) | 4 (11.8) | 0.6650 |
| PH | 0 (0) | 1 (1.8) | 0.5279 | 0 (0) | 1 (2.9) | 0.3684 |
| Rheumatologic disease | 5 (6.1) | 8 (14.3) | 0.2471 | 15 (10.5) | 7 (20.6) | 0.3001 |
| Stroke | 4 (4.9) | 4 (7.3) | 0.7992 | 2 (1.4) | 6 (18.2) | 0.0054 |
| TIA | 1 (1.2) | 2 (3.6) | 0.6584 | 1 (0.7) | 2 (6.1) | 0.2177 |
| **COVID-19 Symptoms (n (%))** | |  |  |  |  |  |
| Total number (mean (SD)) | 5.3 (3.1) | 4.6 (2.5) | 0.5974 | 5.4 (3.0) | 4.1 (1.5) | 0.2500 |
| Abdonminal Pain | 7 (8.5) | 3 (5.4) | 0.9337 | 19 (13.1) | 3 (9.1) | 0.9626 |
| Anosmia | 13 (15.9) | 2 (3.6) | 0.1625 | 19 (13.1) | 2 (6.1) | 0.7194 |
| Appetite | 22 (26.8) | 12 (21.4) | 0.7184 | 39 (26.9) | 10 (30.3) | 0.9618 |
| Arthralgia | 6 (7.3) | 3 (5.4) | 0.9337 | 3 (2.1) | 1 (3.0) | 0.9294 |
| Chest pain | 25 (30.5) | 18 (32.1) | 0.9799 | 40 (27.6) | 6 (18.2) | 0.6635 |
| Confusion | 7 (8.5) | 13 (23.2) | 0.1625 | 15 (10.3) | 3 (9.1) | 1.0000 |
| Cough | 59 (72.0) | 32 (57.1) | 0.3098 | 108 (74.5) | 20 (60.6) | 0.5470 |
| Diarrhea | 22 (26.8) | 8 (14.3) | 0.3188 | 43 (29.7) | 5 (15.2) | 0.5470 |
| Dizziness | 9 (11.0) | 5 (8.9) | 0.9324 | 22 (15.2) | 2 (6.1) | 0.6635 |
| Dysphagia | 4 (4.9) | 2 (3.6) | 1.0000 | 2 (1.4) | 0 (0) | 1.0000 |
| Dyspnea | 75 (91.5) | 47 (83.9) | 0.4283 | 135 (93.1) | 28 (84.8) | 0.6633 |
| Edema | 2 (2.4) | 4 (7.1) | 0.4986 | 3 (2.1) | 0 (0) | 1.0000 |
| Extremity weakness | 9 (11.0) | 7 (12.5) | 0.9417 | 26 (17.9) | 3 (9.1) | 0.6635 |
| Fatigue | 47 (57.3) | 29 (51.8) | 0.7788 | 89 (61.4) | 19 (57.6) | 0.9618 |
| Fever | 56 (68.3) | 37 (66.1) | 0.9417 | 97 (66.9) | 19 (57.6) | 0.7027 |
| Headache | 12 (14.6) | 3 (5.4) | 0.3188 | 31 (21.4) | 1 (3.0) | 0.2500 |
| Myalgia | 24 (29.3) | 8 (14.3) | 0.2199 | 34 (23.4) | 2 (6.1) | 0.2500 |
| Nausea | 14 (17.1) | 8 (14.3) | 0.9038 | 17 (11.7) | 5 (15.2) | 0.9294 |
| Rhinorrhea | 4 (4.9) | 2 (3.6) | 1.0000 | 6 (4.1) | 0 (0) | 0.9294 |
| Seizure | 1 (1.2) | 1 (1.8) | 1.0000 | 1 (0.7) | 1 (3.0) | 0.7027 |
| Skin rash | 1 (1.2) | 0 (0) | 1.0000 | 1 (0.7) | 0 (0) | 1.0000 |
| Sore throat | 10 (12.2) | 6 (10.7) | 0.9417 | 16 (11.0) | 1 (3.0) | 0.6635 |
| Sputum | 5 (6.1) | 6 (10.7) | 0.6527 | 13 (9.0) | 2 (6.1) | 0.9626 |
| Wheezing | 2 (2.4) | 1 (1.8) | 1.0000 | 6 (4.1) | 1 (3.0) | 1.0000 |
| **Vital Signs** |  |  |  |  |  |  |
| Diastolic BP [mmHg] | 74.7 (12.6) | 72.7 (12.7) | 0.8250 | 75.2 (11.3) | 71.7 (14.5) | 0.2515 |
| Systolic BP [mmHg] | 127.8 (24.2) | 130.2 (25.2) | 0.8250 | 129.2 (20.6) | 127.6 (28.3) | 0.3143 |
| Heart rate [/min] | 97.9 (19.8) | 94.8 (17.5) | 0.8250 | 96.8 (20.3) | 92.1 (20.8) | 0.3143 |
| Respiratory rate [/min] | 27.8 (8.0) | 25.2 (6.5) | 0.5803 | 26.0 (7.6) | 24.0 (6.6) | 0.3143 |
| Temperature [C] | 37.3 (1.0) | 37.3 (0.8) | 0.8250 | 37.3 (1.0) | 37.4 (1.0) | 0.5407 |
| **Lab results** |  |  |  |  |  |  |
| WBC count [x109/L] | 10.0 (5.1) | 10.2 (7.0) | 0.9656 | 8.4 (4.8) | 9.2 (5.8) | 0.8411 |
| Basophile count [x109/L] | 0.008 (0.02) | 0.007 (0.02) | 0.7902 | 0.01 (0.02) | 0.03 (0.1) | 0.0837 |
| Eosinophile count [x109/L] | 0.04 (0.2) | 0.02 (0.1) | 0.9656 | 0.02 (0.1) | 0.02 (0.1) | 0.3859 |
| Lymphocyte count [x109/L] | 0.8 (0.6) | 1.0 (1.9) | 0.9142 | 0.8 (0.5) | 0.8 (0.5) | 0.8067 |
| Monocyte count [x109/L] | 0.6 (0.4) | 0.7 (1.2) | 0.9656 | 0.5 (0.4) | 0.7 (0.6) | 0.3859 |
| Neutrophil count [x100/L] | 8.5 (4.8) | 8.2 (4.7) | 0.9656 | 6.9 (4.2) | 7.5 (5.1) | 0.8659 |
| Haemoglobin [g/L] | 132.3 (20.6) | 125.8 (15.1) | 0.7308 | 132.2 (20.3) | 130.8 (25.5) | 0.8067 |
| Platelet count [x109/L] | 227.8 (99.6) | 218.4 (95.1) | 0.9656 | 228.4 (101.9) | 183.0 (75.4) | 0.0837 |
| ALT [U/L] | 149.0 (545.2) | 52.0 (51.1) | 0.8575 | 44.7 (31.6) | 37.1 (32.5) | 0.3859 |
| Creatinine [umol/L] | 132.3 (175.6) | 135.3 (115.9) | 0.9142 | 110.5 (161.4) | 154.8 (91.6) | 0.0036 |
| Glucose [mmol/L] | 9.9 (4.9) | 10.6 (4.9) | 0.8575 | 8.4 (4.0) | 8.0 (4.4) | 0.8067 |
| Potassium [mmol/L] | 4.2 (0.7) | 4.2 (0.5) | 0.9656 | 4.1 (0.5) | 4.3 (0.9) | 0.8411 |
| Sodium [mmol/L] | 137.7 (5.2) | 137.5 (5.7) | 0.9656 | 136.6 (4.6) | 137.8 (5.7) | 0.8067 |
| ***During hospitalization*** | |  |  |  |  |  |
| **Hospitalization details** | |  |  |  |  |  |
| Number of days hospitalized (mean (SD)) | 37.8 (38.7) | 30.5 (29.3) | 0.8580 | 18.8 (22.4) | 21.7 (21.3) | 0.3404 |
| ICU stay (n (%)) | 78 (95.1) | 50 (89.3) | 0.5865 | 90 (62.1) | 20 (58.8) | 0.7264 |
| Number of days in ICU (mean (SD)) | 22.4 (29.8) | 29.6 (30.5) | 0.0527 | 10.0 (13.9) | 22.3 (24.0) | 0.0009 |
| **Complications - Other than ARDS (n (%))** | | |  |  |  |  |
| AKI | 34 (42.0) | 34 (60.7) | 0.1447 | 20 (13.9) | 16 (47.1) | 0.0031 |
| Anemia | 20 (24.4) | 22 (40.0) | 0.1724 | 27 (18.6) | 8 (23.5) | 1.0000 |
| Arrest | 1 (1.2) | 8 (14.5) | 0.0273 | 0 (0) | 0 (0) | NA |
| Arrythmia | 5 (6.1) | 10 (18.5) | 0.1198 | 7 (4.8) | 1 (2.9) | 1.0000 |
| AF | 12 (14.6) | 8 (14.5) | 1.0000 | 7 (4.9) | 1 (2.9) | 1.0000 |
| Bacteremia | 17 (20.7) | 15 (27.8) | 0.6064 | 7 (4.8) | 2 (5.9) | 1.0000 |
| COP | 3 (3.7) | 2 (3.6) | 1.0000 | 3 (2.1) | 0 (0) | 1.0000 |
| DVT | 3 (3.7) | 1 (1.8) | 0.8580 | 1 (0.7) | 2 (6.1) | 0.4114 |
| DIC | 1 (1.3) | 1 (1.9) | 1.0000 | 1 (0.7) | 0 (0) | 1.0000 |
| Endocarditis | 1 (1.2) | 0 (0) | 1.0000 | 0 (0) | 0 (0) | NA |
| GI bleed | 1 (1.2) | 0 (0) | 1.0000 | 2 (1.4) | 2 (5.9) | 0.5352 |
| Heart failure | 2 (2.4) | 6 (11.1) | 0.1850 | 2 (1.4) | 0 (0) | 1.0000 |
| Hyperglycemia | 33 (40.7) | 26 (47.3) | 0.6892 | 29 (20.3) | 2 (5.9) | 0.3050 |
| Hypernatremia | 5 (6.1) | 0 (0) | 0.2173 | 3 (2.1) | 1 (2.9) | 1.0000 |
| Hypoglycemia | 2 (2.5) | 1 (1.8) | 1.0000 | 6 (4.1) | 1 (2.9) | 1.0000 |
| Hyponatremia | 9 (11.0) | 5 (9.1) | 0.8989 | 2 (1.4) | 1 (2.9) | 1.0000 |
| LVF | 4 (5.4) | 6 (13.6) | 0.5794 | 6 (4.7) | 0 (0) | 1.0000 |
| Liver | 17 (20.7) | 9 (16.4) | 0.7734 | 18 (12.4) | 1 (2.9) | 0.5061 |
| NSTEMI | 9 (11.0) | 6 (10.9) | 1.0000 | 8 (5.5) | 2 (5.9) | 1.0000 |
| Pancreatitis | 1 (1.2) | 0 (0) | 1.0000 | 2 (1.4) | 0 (0) | 1.0000 |
| PE | 19 (23.2) | 11 (20.0) | 0.8580 | 10 (6.9) | 1 (2.9) | 1.0000 |
| Pericarditis | 0 (0) | 0 (0) | NA | 2 (1.4) | 0 (0) | 1.0000 |
| Pleural effusion | 13 (15.9) | 12 (21.8) | 0.6510 | 13 (9.0) | 10 (29.4) | 0.0341 |
| Pneumonia | 29 (35.8) | 29 (52.7) | 0.1724 | 23 (16.0) | 4 (12.1) | 1.0000 |
| Pneumonitis | 43 (52.4) | 24 (43.6) | 0.5865 | 50 (34.7) | 18 (52.9) | 0.3050 |
| Pneumothorax | 6 (7.3) | 9 (16.4) | 0.2474 | 5 (3.5) | 1 (2.9) | 1.0000 |
| Rhabdomyolysis | 1 (1.2) | 5 (9.3) | 0.1536 | 0 (0) | 1 (2.9) | 0.5352 |
| Seizure | 1 (1.2) | 1 (1.8) | 1.0000 | 0 (0) | 1 (2.9) | 0.5352 |
| STEMI | 1 (1.2) | 0 (0) | 1.0000 | 3 (2.1) | 1 (3.0) | 1.0000 |
| Stroke | 0 (0) | 3 (5.6) | 0.1850 | 1 (0.7) | 2 (5.9) | 0.4114 |
| TIA | 0 (0) | 0 (0) | NA | 1 (0.7) | 0 (0) | 1.0000 |
| VT | 1 (1.2) | 6 (10.9) | 0.0956 | 1 (0.7) | 1 (3.0) | 0.8801 |
| **Drug treatments administered - Other than corticosteroids (n (%))** | | | | |  |  |
| Antifungal | 18 (22.0) | 20 (35.7) | 0.2082 | 8 (5.5) | 8 (23.5) | 0.0272 |
| Azithromycin | 64 (78.0) | 39 (69.6) | 0.5497 | 87 (60.0) | 18 (52.9) | 0.8536 |
| Chloroquine | 0 (0) | 1 (1.8) | 0.6558 | 1 (0.7) | 0 (0) | 1.0000 |
| Colchicine | 1 (1.2) | 1 (1.8) | 1.0000 | 5 (3.4) | 0 (0) | 0.9041 |
| Hydroxychloroquine | 0 (0) | 1 (1.8) | 0.6558 | 0 (0) | 0 (0) | NA |
| Invermectin | 3 (3.7) | 3 (5.4) | 0.8799 | 5 (3.4) | 1 (2.9) | 1.0000 |
| IVIG | 1 (1.2) | 0 (0) | 1.0000 | 3 (2.1) | 0 (0) | 1.0000 |
| Kineret | 1 (1.2) | 0 (0) | 1.0000 | 5 (3.4) | 0 (0) | 0.9041 |
| Other Antibiotics[[4]](#footnote-4) | 73 (89.0) | 54 (96.4) | 0.4527 | 107 (73.8) | 32 (94.1) | 0.0595 |
| Other Antiviralsd | 1 (1.2) | 5 (8.9) | 0.1538 | 2 (1.4) | 6 (17.6) | 0.0119 |
| Other immunomodulatorsd | 2 (2.4) | 5 (8.9) | 0.2942 | 7 (4.8) | 4 (11.8) | 0.6355 |
| Plasma | 2 (2.4) | 1 (1.8) | 1.0000 | 2 (1.4) | 2 (5.9) | 0.5566 |
| Remdesivir | 15 (18.3) | 4 (7.1) | 0.1850 | 30 (20.7) | 5 (14.7) | 0.8536 |
| Ribavirin | 0 (0) | 0 (0) | NA | 1 (0.7) | 0 (0) | 1.0000 |
| Sarilumab | 1 (1.2) | 2 (3.6) | 0.8111 | 2 (1.4) | 0 (0) | 1.0000 |
| Stem cells | 0 (0) | 0 (0) | NA | 0 (0) | 0 (0) | NA |
| Tocilizumab | 31 (37.8) | 12 (21.4) | 0.1538 | 44 (30.3) | 4 (11.8) | 0.1177 |
| **Non-drug interventions administered** | | |  |  |  |  |
| O2 therapy (n (%)) | 82 (100.0) | 55 (100.0) | NA | 140 (100.0) | 33 (100.0) | NA |
| Number of days O2 therapy (mean (SD)) | 30.9 (36.0) | 30.8 (33.7) | 1.0000 | 12.3 (17.8) | 22.0 (19.3) | 0.0072 |
| IVM (n (%)) | 43 (52.4) | 44 (78.6) | 0.0182 | 22 (15.2) | 15 (44.1) | 0.0036 |

**Table A.3. Risk factors for ARDS development**

| **Features** | **Odds  ratio** | **P-values** | **95%  Confidence  intervals** | **Significance** |
| --- | --- | --- | --- | --- |
| Intercept | 0 | 0.015 | [0 - 0.123] | * |
| **Patient  characteristics** |  |  |  |  |
| Sex | 0.659 | 0.24 | [0.329 - 1.321] |  |
| Age | 1.004 | 0.724 | [0.981 - 1.029] |  |
| **Comorbidities** |  |  |  |  |
| Nb comorbidities | 0.819 | 0.066 | [0.662 - 1.013] |  |
| Lung | 3.001 | 0.06 | [0.955 - 9.435] |  |
| Stroke | 2.148 | 0.302 | [0.503 - 9.169] |  |
| Cancer | 1.213 | 0.734 | [0.398 - 3.696] |  |
| Dementia | 0.553 | 0.483 | [0.106 - 2.891] |  |
| Hypertension | 1.821 | 0.154 | [0.799 - 4.149] |  |
| MI | 7.485 | 0.014 | [1.5 - 37.36] | * |
| CAD | 0.9 | 0.863 | [0.272 - 2.977] |  |
| Hematological disease | 1.456 | 0.593 | [0.368 - 5.764] |  |
| COPD | 1.124 | 0.835 | [0.373 - 3.388] |  |
| Obesity | 2.096 | 0.098 | [0.873 - 5.037] |  |
| CKD | 0.598 | 0.415 | [0.173 - 2.063] |  |
| **Lab results** |  |  |  |  |
| WBC count | 1.165 | 0.442 | [0.79 - 1.719] |  |
| Neutrophil count | 0.942 | 0.775 | [0.625 - 1.42] |  |
| Lymphocyte count | 0.941 | 0.867 | [0.461 - 1.921] |  |
| Basophil count | 0 | 0.002 | [0 - 0] | ** |
| Creatinine | 1.001 | 0.43 | [0.999 - 1.003] |  |
| Sodium | 1.071 | 0.035 | [1.005 - 1.141] | * |
| Glucose | 1.057 | 0.121 | [0.985 - 1.134] |  |

**Table A.4. Risk factors for mortality**

| **Features** | **Odds  ratio** | **P-value** | **95% Confidence  intervals** | **Significance** |
| --- | --- | --- | --- | --- |
| Intercept | 0.001 | 0.2 | [0 - 31.242] |  |
| **Patient characteristics** | |  |  |  |
| Sex | 0.992 | 0.985 | [0.429 - 2.293] |  |
| Age | 1.078 | 0 | [1.039 - 1.118] | *** |
| **Comorbidities** |  |  |  |  |
| Nb comorbidities | 0.964 | 0.769 | [0.754 - 1.232] |  |
| Lung | 3.88 | 0.027 | [1.166 - 12.911] | * |
| Stroke | 3.716 | 0.072 | [0.891 - 15.506] |  |
| Cancer | 1.257 | 0.704 | [0.386 - 4.089] |  |
| Dementia | 1.575 | 0.557 | [0.345 - 7.185] |  |
| Hypertension | 0.581 | 0.266 | [0.223 - 1.512] |  |
| MI | 1.397 | 0.651 | [0.328 - 5.955] |  |
| CAD | 1.536 | 0.473 | [0.475 - 4.964] |  |
| Hematologic disease | 1.305 | 0.741 | [0.27 - 6.313] |  |
| COPD | 1.546 | 0.436 | [0.516 - 4.631] |  |
| Obesity | 0.804 | 0.714 | [0.25 - 2.584] |  |
| CKD | 2.038 | 0.265 | [0.583 - 7.125] |  |
| **Lab results** |  |  |  |  |
| WBC count | 1.166 | 0.294 | [0.875 - 1.553] |  |
| Neutrophil count | 0.895 | 0.49 | [0.652 - 1.227] |  |
| Lymphocyte count | 0.75 | 0.333 | [0.418 - 1.344] |  |
| Basophil count | 22.027 | 0.655 | [0 - 17152116.826] |  |
| Creatinine | 1 | 0.821 | [0.998 - 1.003] |  |
| Sodium | 0.998 | 0.96 | [0.927 - 1.075] |  |
| Glucose | 1.035 | 0.39 | [0.957 - 1.119] |  |

1. P-values adjusted with the Benjamini-Hochberg method and adjusted P-values of less than 0.05 were considered statistically significant. Parametric Pearson chi-squared or non-parametric Fisher’s exact tests were used to compare categorical variables appropriately. Either the Two sample t-test, Welch’s two sample t-test or the Mann-Whitney-Wilcoxon test were used to compare continuous data. [↑](#footnote-ref-1)
2. Antibiotics, antivirals or immunomodulators not otherwise listed in e-Table 1. Information on specific treatments was not available. [↑](#footnote-ref-2)
3. P-values adjusted with the Benjamini-Hochberg method and adjusted P-values of less than 0.05 were considered statistically significant. Parametric Pearson chi-squared or non-parametric Fisher’s exact tests were used to compare categorical variables appropriately. Either the Two sample t-test, Welch’s two sample t-test or the Mann-Whitney-Wilcoxon test were used to compare continuous data. [↑](#footnote-ref-3)
4. Antibiotics, antivirals or immunomodulators not otherwise listed in e-Table 2. Information on specific treatments was not available. [↑](#footnote-ref-4)
